# Supplementary material
Source: Springer Nature journal article supplement (https://www.springermedizin.de/resource/supplementary/12967_2011_790_MOESM9_ESM.pdf/9577064)

**A) Neutralization of WSN-WT virus**

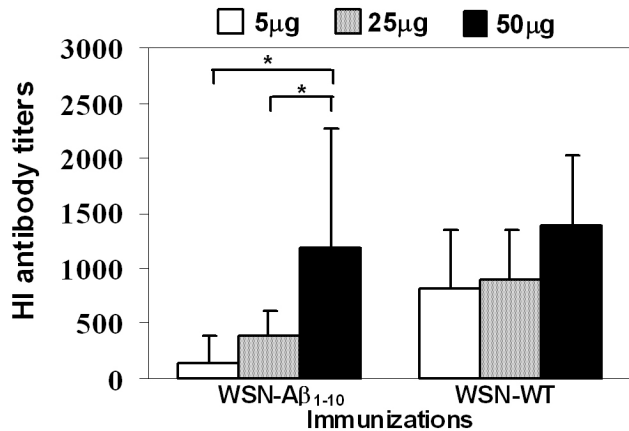

**B) Neutralization of WSN-A $\beta$ <sub>1-10</sub> virus**

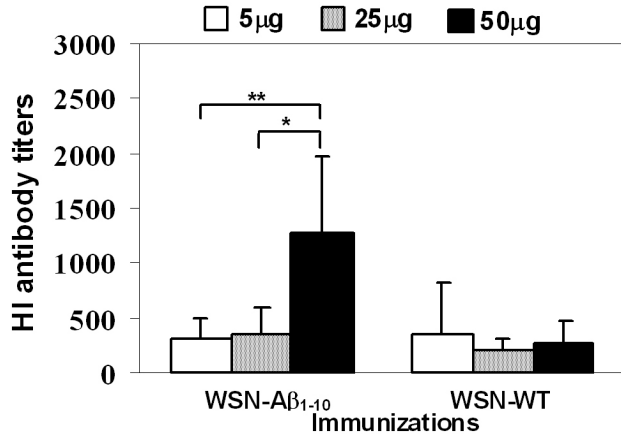

Supplement: MOESM9 [file 9577064]
